# Supplementary material
Source: MDPI journal article supplement (https://www.mdpi.com/2304-6740/9/8/64)
Supplement: s1 [file s1]

## Supporting Information for

### **Switching the Local Symmetry from $D_{5h}$ to $D_{4h}$ for Single-molecule Magnets by non-Coordinating Solvents**

Xia-Li Ding <sup>1</sup>, Qian-Cheng Luo <sup>1</sup>, Yuan-Qi Zhai <sup>1</sup>, Qian Zhang <sup>2,\*</sup>, Lei Tian <sup>3</sup>,  
Xinliang Zhang <sup>4</sup>, Chao Ke <sup>5</sup>, Xu-Feng Zhang <sup>6</sup>, Yi Lv <sup>6</sup> and Yan-Zhen Zheng <sup>1,\*</sup>

<sup>1</sup> Frontier Institute of Science and Technology (FIST), Xi'an Jiaotong University Shenzhen Research School, State Key Laboratory for Mechanical Behavior of Materials, MOE Key Laboratory for Nonequilibrium Synthesis and Modulation of Condensed Matter, Xi'an Key Laboratory of Sustainable Energy and Materials Chemistry, School of Chemistry and School of Physics, 99 Yanxiang Road, Xi'an, Shaanxi 710054, P. R. China; zheng.yanzhen@xjtu.edu.cn

<sup>2</sup> State Key Laboratory of Military Stomatology & National Clinical Research Center for Oral Diseases & Shaanxi International Joint Research Center for Oral Diseases, Department of General Dentistry and Emergency, School of Stomatology, Air Force Medical University, 169 West Changle Road, Xi'an, Shaanxi 710032, P. R. China; laolvshu@126.com

<sup>3</sup> State Key Laboratory of Military Stomatology, National Clinical Research Center of Oral Diseases, Shaanxi Key Laboratory of Oral Diseases, Department of Cranio-facial Trauma and Orthognathic Surgery, School of Stomatology, The Fourth Military Medical University, 145 West Changle Road, Xi'an, Shaanxi 710032, P. R. China; tianleison@163.com

<sup>4</sup> Department of Spine Surgery, Honghui Hospital, Xi'an Jiaotong University, 76 Nanguo Road, Xi'an, Shaanxi 710054, P. R. China; xaxinliang@stu.xjtu.edu.cn

<sup>5</sup> Department of Orthopaedic Trauma, Honghui Hospital, College of Medicine, Xi'an Jiaotong University, 28 West Xianning Road, Xi'an, Shaanxi 710054, P. R. China; kechao373855288@163.com

<sup>6</sup> Department of Hepatobiliary Surgery, The First Affiliated Hospital of Xi'an Jiaotong University, 277 West Yanta Road, Xi'an, Shaanxi 710061, P. R. China; luyi169@126.com

\*Correspondence: laolvshu@126.com (QZ), zheng.yanzhen@xjtu.edu.cn (YZZ); Tel.: +86-(0)29-83395172

# Contents

|                                                                                                                                                                |            |
|----------------------------------------------------------------------------------------------------------------------------------------------------------------|------------|
| <b>1. Experimental.....</b>                                                                                                                                    | <b>S1</b>  |
| <b>Figure S1.</b> The IR spectrum of complex <b>1</b> and <b>2</b> .....                                                                                       | <b>S1</b>  |
| <b>2. X-ray Crystallography Data.....</b>                                                                                                                      | <b>S2</b>  |
| <b>Table S1.</b> Crystallographic data for complex <b>1</b> and <b>2</b> .....                                                                                 | <b>S2</b>  |
| <b>Table S2.</b> Selected Bond Lengths (Å) and Bond Angles (deg) for complex <b>1</b> and <b>2</b> .....                                                       | <b>S3</b>  |
| <b>Table S3.</b> The CShM's values of the first coordination sphere of compound <b>1</b> .....                                                                 | <b>S4</b>  |
| <b>Table S4.</b> The CShM's values of the first coordination sphere of compound <b>2</b> .....                                                                 | <b>S4</b>  |
| <b>Figure S2.</b> Packing diagram for complex <b>1</b> .....                                                                                                   | <b>S4</b>  |
| <b>Figure S3.</b> Packing diagram for complex <b>2</b> .....                                                                                                   | <b>S5</b>  |
| <b>3. Magnetic Properties.....</b>                                                                                                                             | <b>S6</b>  |
| <b>Table S4.</b> Relaxation fitting parameters of a generalized Debye model for <b>1</b> .....                                                                 | <b>S6</b>  |
| <b>Figure S4.</b> The variable-temperature dc magnetic susceptibility (1 kOe) and the field dependence of the magnetization (inset) at 2 K for <b>1</b> .....  | <b>S7</b>  |
| <b>Figure S5.</b> Temperature-dependence of the in-phase $\chi'$ and out-of-phase $\chi''$ ac susceptibility signals under zero dc field for <b>1</b> .....    | <b>S7</b>  |
| <b>Figure S6.</b> Frequency-dependence of the in-phase $\chi'$ and out-of-phase $\chi''$ in a zero dc field for <b>1</b> with ac frequencies of 1-1218 Hz..... | <b>S7</b>  |
| <b>Figure S7.</b> Cole-Cole plots for the ac susceptibilities in a zero dc field for <b>1</b> . ....                                                           | <b>S8</b>  |
| <b>4. Electronic Structure Calculations.....</b>                                                                                                               | <b>S9</b>  |
| <b>Table S5</b> <i>Ab initio</i> results for the $J = 15/2$ multiple of $\text{Dy}^{\text{III}}$ in <b>1</b> .....                                             | <b>S9</b>  |
| <b>Table S6</b> <i>Ab initio</i> calculated crystal field parameters for <b>1</b> .....                                                                        | <b>S10</b> |
| <b>Table S7.</b> <i>Ab initio</i> calculated LoProp charges of the atoms near Dy center in <b>1</b> .....                                                      | <b>S10</b> |
| <b>Table S8.</b> Average transition magnetic moment elements between the states of <b>1</b> .....                                                              | <b>S11</b> |
| <b>5. DFT Calculations.....</b>                                                                                                                                | <b>S12</b> |
| <b>Table S9.</b> Geometry coordinates of <b>1</b> in population analysis calculations.....                                                                     | <b>S12</b> |
| <b>Table S10.</b> Geometry coordinates of <b>2</b> in population analysis calculations.....                                                                    | <b>S15</b> |
| <b>Table S11.</b> Geometry coordinates of toluene molecule in population analysis calculations.....                                                            | <b>S17</b> |
| <b>Table S12.</b> Geometry coordinates of THF molecule in population analysis calculations.....                                                                | <b>S17</b> |
| <b>Table S13.</b> Geometry coordinates of 4-phenylpyridine in population analysis calculations.....                                                            | <b>S17</b> |
| <b>References.....</b>                                                                                                                                         | <b>S19</b> |

# 1. Experimental

## 1.1 Materials and method

All reactions were carried out under a dry and oxygen-free argon atmosphere in a glovebox. THF, Toluene and Hexane were dried and degassed by standard techniques. Anhydrous  $\text{DyCl}_3$  salts were prepared according to the literature procedure, 4-Phenylpyridine (4-PhPy),  $\text{Na}^t\text{OBu}$  and  $\text{NaBPh}_4$  are commercially available and were directly used without further treatment.

## 1.2 Synthesis of the complex 1 and 2

### Synthesis of complex $[\text{Dy}^t\text{OBu})_2(4\text{-PhPy})_4][\text{BPh}_4]$ (**1**)

In an argon glovebox, reactants of  $\text{DyCl}_3$  (0.5 mmol, 134 mg),  $\text{Na}^t\text{OBu}$  (1 mmol, 96mg) and  $\text{NaBPh}_4$  (0.5 mmol, 171 mg) are added into about 10 mL THF in Schlenk tube and gives a cloudy solution, which was filtrated and the solvent was removed by vacuum to get a white powder of the products. And then, add the 2 ml Tol and 4-PhPy (3 mmol, 465 mg) to the powder. In the end, the Crystals suitable for X-ray diffraction were grown by slow diffusion of hexane to THF solution of **1** at room temperature and then obtained the better quality colorless block crystal after three days. Yield 278mg, 36% (based on Dy). Elemental analysis calcd (%) for  $\text{C}_{98}\text{H}_{95}\text{BDyN}_5\text{O}_2$ : C 76.03, H 6.19, N 4.52; found: C 76.05, H 6.20, N 4.53. IR as showed in Figure S1.

### Synthesis of complex $\text{Na}\{[\text{Dy}(\text{O}^t\text{Bu})_2(4\text{-PhPy})_4][\text{BPh}_4]_2\} \cdot 2\text{thf} \cdot \text{hex}$ (**2**)

The synthesis was the same as **1** with THF replaced by Tol, the detailed process can be seen in our previous reported literature<sup>[5]</sup>.

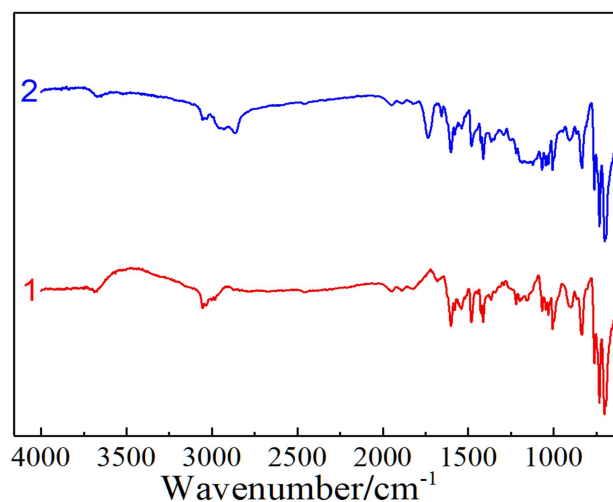

**Figure. S1** The IR spectrum of complex **1** and **2**

## 2. X-ray Crystallography Data

All data were recorded on a Bruker SMART CCD diffractometer with MoK $\alpha$  radiation ( $\lambda = 0.71073$  Å). The structures were solved by direct methods and refined on  $F^2$  using SHELXTL. CCDC 2086927 (**1**) contain the supplementary crystallographic data for this paper. These data can be obtained free of charge via [www.ccdc.cam.ac.uk/conts/retrieving.html](http://www.ccdc.cam.ac.uk/conts/retrieving.html) (or from the Cambridge Crystallographic Data Centre, 12 Union Road, Cambridge CB21EZ, UK; fax: (+44)1223-336-033; or [deposit@ccdc.cam.ac.uk](mailto:deposit@ccdc.cam.ac.uk)).

**Table S1.** Crystallographic data for complex **1** and **2**.

| <b>Complex</b>                 | <b>1</b>                                                         | <b>2</b>                                                                           |
|--------------------------------|------------------------------------------------------------------|------------------------------------------------------------------------------------|
| Formula                        | C <sub>98</sub> H <sub>95</sub> BDyN <sub>5</sub> O <sub>2</sub> | C <sub>114</sub> H <sub>124</sub> B <sub>2</sub> DyN <sub>4</sub> NaO <sub>4</sub> |
| F.w.                           | 1548.09                                                          | 1821.27                                                                            |
| $T$ (K)                        | 150                                                              | 150                                                                                |
| Space group                    | $P-1$                                                            | $Pn-3n$                                                                            |
| $a$ (Å)                        | 14.573(17)                                                       | 31.276(5)                                                                          |
| $b$ (Å)                        | 15.991(19)                                                       | 31.276(5)                                                                          |
| $c$ (Å)                        | 19.048(2)                                                        | 31.276(5)                                                                          |
| $\alpha$ (°)                   | 91.490(2)                                                        | 90                                                                                 |
| $\beta$ (°)                    | 91.613(2)                                                        | 90                                                                                 |
| $\gamma$ (°)                   | 112.743(2)                                                       | 90                                                                                 |
| $V$ (Å <sup>3</sup> )          | 4089.1(8)                                                        | 30595.6(15)                                                                        |
| $Z$                            | 2                                                                | 6                                                                                  |
| $D_c$ (g.cm <sup>-3</sup> )    | 1.257                                                            | 0.593                                                                              |
| $\mu$ (mm <sup>-1</sup> )      | 0.966                                                            | 2.180                                                                              |
| $R_1$ ( $>2\sigma$ /all data)  | 0.0370/0.0852                                                    | 0.0668                                                                             |
| $wR_2$ ( $>2\sigma$ /all data) | 0.0505/0.0907                                                    | 0.2063                                                                             |
| GOF                            | 1.044                                                            | 1.050                                                                              |
| Residues (e Å <sup>-3</sup> )  | 1.53/-1.01                                                       | 1.49/-0.98                                                                         |
| CCDC                           | 2086927                                                          | 1970693                                                                            |

**Table S2.** Selected Bond Lengths (Å) and Bond Angles (deg) for complex **1** and **2**.

| Complex 1  |          |                 |           |
|------------|----------|-----------------|-----------|
| Dy(1)-O(1) | 2.125(2) | O(1)-Dy(1)-O(2) | 175.14(9) |
| Dy(1)-O(2) | 2.121(2) | N(1)-Dy(1)-N(2) | 70.60(9)  |
| Dy(1)-N(1) | 2.549(3) | N(1)-Dy(1)-N(4) | 74.39(9)  |
| Dy(1)-N(2) | 2.591(3) | N(3)-Dy(1)-N(4) | 75.88(9)  |
| Dy(1)-N(3) | 2.585(3) | N(3)-Dy(1)-N(5) | 70.43(9)  |
| Dy(1)-N(4) | 2.594(3) | O(1)-Dy(1)-N(3) | 89.70(9)  |
| Dy(1)-N(5) | 2.566(3) | O(2)-Dy(1)-N(4) | 89.23(9)  |
| N(1)-C(1)  | 1.337(6) | O(2)-Dy(1)-N(1) | 91.70(9)  |

  

| Complex 2                    |           |                                            |          |
|------------------------------|-----------|--------------------------------------------|----------|
| Dy(1)-O(1)                   | 2.066(8)  | O(1)-Dy(1)-O(1) <sup>1</sup>               | 180.0    |
| Dy(1)-O(1) <sup>1</sup>      | 2.066(8)  | O(1) <sup>1</sup> -Dy(1)-N(1)              | 90.0 (1) |
| Dy(1)-N(1)                   | 2.468(6)  | O(1)-Dy(1)-N(1) <sup>1</sup>               | 90.0(2)  |
| Dy(1)-N(1) <sup>1</sup>      | 2.468(6)  | O(1)-Dy(1)-N(1) <sup>2</sup>               | 90.0(3)  |
| Dy(1)-N(1) <sup>2</sup>      | 2.468(6)  | O(1)-Dy(1)-N(1) <sup>3</sup>               | 90.0(1)  |
| Dy(1)-N(1) <sup>3</sup>      | 2.468(6)  | N(1)-Dy(1)-N(1) <sup>1</sup>               | 180.0(5) |
| O(1)-C(8)                    | 1.434(13) | O(1) <sup>1</sup> -Dy(1)-N(1) <sup>1</sup> | 90.0(1)  |
| N(1)-C(1)                    | 1.337(6)  | O(1) <sup>1</sup> -Dy(1)-N(1) <sup>2</sup> | 90.0(1)  |
| C(1)-C(2)                    | 1.358(6)  | N(1)-Dy(1)-N(1) <sup>3</sup>               | 90.0(1)  |
| C(3)-C(4)                    | 1.486(10) | N(1) <sup>1</sup> -Dy(1)-N(1) <sup>2</sup> | 90.0(2)  |
| C(5)-C(6)                    | 1.384(8)  | N(1) <sup>2</sup> -Dy(1)-N(1) <sup>3</sup> | 90.0(1)  |
| N(1)-Dy(1)-N(1) <sup>2</sup> | 180.0(5)  | N(1) <sup>1</sup> -Dy(1)-N(1) <sup>3</sup> | 90.0(1)  |

<sup>1</sup>3/2-X,1/2-Y,+Z; <sup>2</sup>3/2-X,+Y,3/2-Z; <sup>3</sup>+X,1/2-Y,3/2-Z

**Table S3.** The CShM's values of the first coordination sphere of compound **1**, referring to all standard 7 vertices polyhedrons.

| Reference shapes | HP-7     | HPY-7    | PBPY-7   | COC-7    | CTPR-7   | JPBPY-7  | JETPY-7  |
|------------------|----------|----------|----------|----------|----------|----------|----------|
| Symmetry         | $D_{7h}$ | $C_{6v}$ | $D_{5h}$ | $D_{3v}$ | $C_{2v}$ | $D_{5h}$ | $C_{3v}$ |
| <b>1</b>         | 33.412   | 22.977   | 0.889    | 7.911    | 6.022    | 1.351    | 23.065   |

HP-7: Heptagon; HPY-7: Hexagonal pyramid; PBPY-7: Pentagonal bipyramid; COC-7: Capped octahedron; CTPR-7: Capped trigonal prism; JPBPY-7: Johnson pentagonal bipyramid; JETPY-7: Johnson elongated triangular pyramid.

**Table S4.** The CShM's values of the first coordination sphere of compound **2**, referring to all standard 6 vertices polyhedrons.

| Reference Shapes | Hexagon  | Pentagonal pyramid | Octahedron | Trigonal prism | Johnson pentagonal pyramid |
|------------------|----------|--------------------|------------|----------------|----------------------------|
| Symmetry         | $D_{6h}$ | $C_{5v}$           | $O_h$      | $D_{3h}$       | $C_{5v}$                   |
| <b>Dy1 in 2</b>  | 33.216   | 28.954             | 0.693      | 16.800         | 31.659                     |

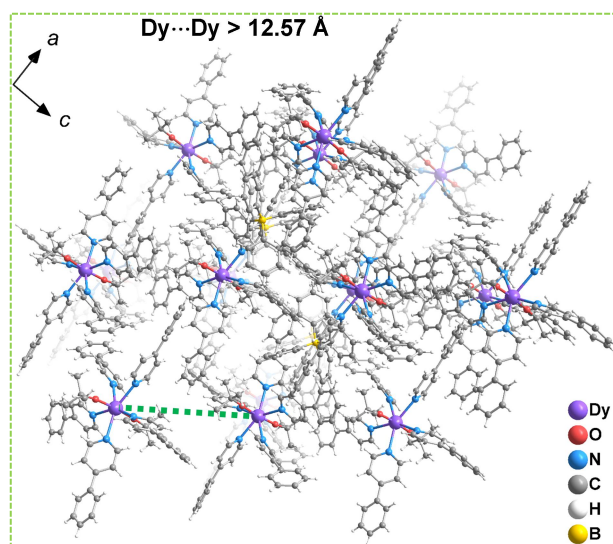

**Figure S2.** Packing diagram for complex **1**.

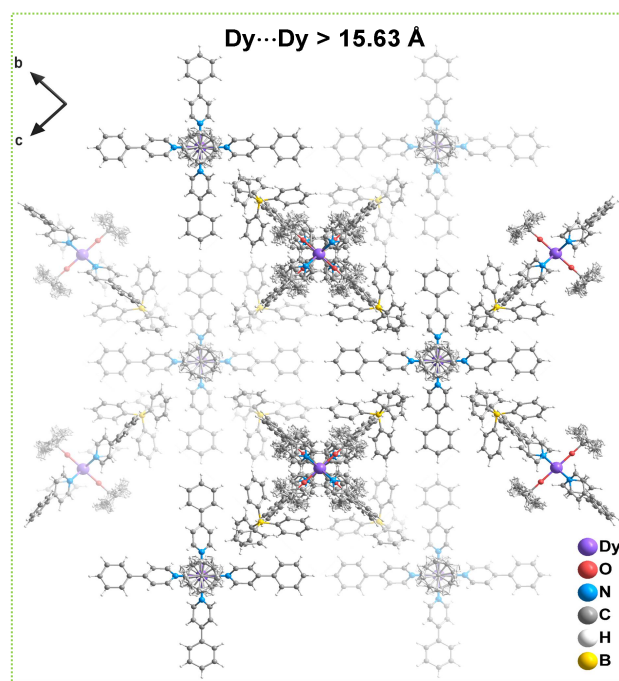

**Figure S3.** Packing diagram for complex 2.

### 3. Magnetic Properties

Magnetic susceptibility measurements have been carried out with a Quantum Design MPMS-XL7 SQUID magnetometer upon cooling from 300 to 2 K in variable applied fields. Ac susceptibility measurements have been performed at frequencies of between 1 and 1500 Hz with an oscillating field of 3.5 Oe and with variable dc applied field. Powder samples were embedded in eicosane to avoid any field induced crystal reorientation. Crystalline powders were fixed with eicosane, wrapped with film, and placed in the center of a straw. A diamagnetic correction has been calculated from Pascal constants and embedding eicosane has been applied to the observed magnetic susceptibility.

**Table S4.** Relaxation fitting parameters of a generalized Debye model for **1**.

| $T$ | $\chi_s$ | $\chi_r$ | $\tau$     | $\alpha$    |
|-----|----------|----------|------------|-------------|
| 40  | 0.03718  | 0.06511  | 0.00111    | 4.04035E-17 |
| 43  | 0.04284  | 0.11819  | 0.02832    | 4.17255E-16 |
| 46  | 0.04156  | 0.10175  | 0.00845    | 7.31436E-16 |
| 49  | 0.04035  | 0.09102  | 0.00211    | 8.90148E-16 |
| 52  | 0.04178  | 0.08608  | 7.32758E-4 | 1.51462E-15 |
| 55  | 0.04719  | 0.08157  | 3.41279E-4 | 2.43371E-15 |
| 58  | 0.06664  | 0.10137  | 0.00917    | 1.37924E-22 |
| 61  | 0.0669   | 0.13069  | 0.07542    | 4.34904E-22 |
| 64  | 0.0643   | 0.1246   | 0.06952    | 6.25656E-22 |
| 67  | 0.06114  | 0.11987  | 0.05657    | 1.28719E-21 |
| 70  | 0.0596   | 0.11461  | 0.04454    | 1.9819E-21  |
| 73  | 0.05721  | 0.1098   | 0.03006    | 3.28085E-21 |
| 76  | 0.05424  | 0.10693  | 0.01862    | 4.75149E-21 |
| 79  | 0.05315  | 0.1036   | 0.0099     | 8.60968E-21 |
| 82  | 0.05076  | 0.09957  | 0.00506    | 1.52023E-20 |
| 85  | 0.04903  | 0.09574  | 0.00265    | 2.93391E-20 |
| 88  | 0.04733  | 0.09199  | 0.00134    | 5.62355E-20 |
| 91  | 0.04736  | 0.09009  | 7.3934E-4  | 8.59742E-20 |
| 94  | 0.04476  | 0.08729  | 3.8823E-4  | 1.39697E-19 |
| 97  | 0.04422  | 0.08469  | 2.30956E-4 | 1.68881E-19 |



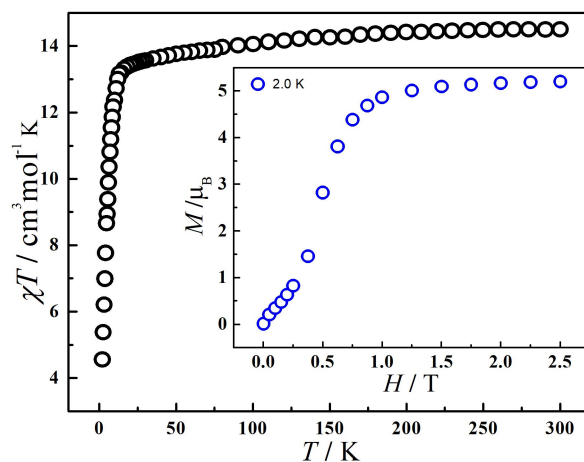

**Figure S4.** The variable-temperature dc magnetic susceptibility (1000 Oe) and the field dependence of the magnetization (inset) at 2 K for **1**.

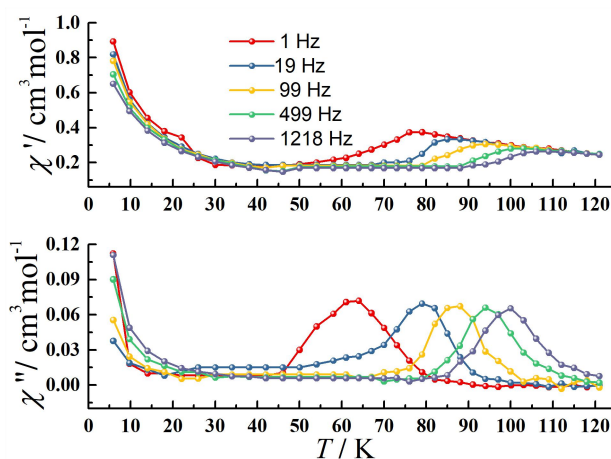

**Figure S5.** Temperature-dependence of the in-phase ( $\chi'$ ) and out-of-phase ( $\chi''$ ) ac susceptibility signals under zero dc field for **1**.

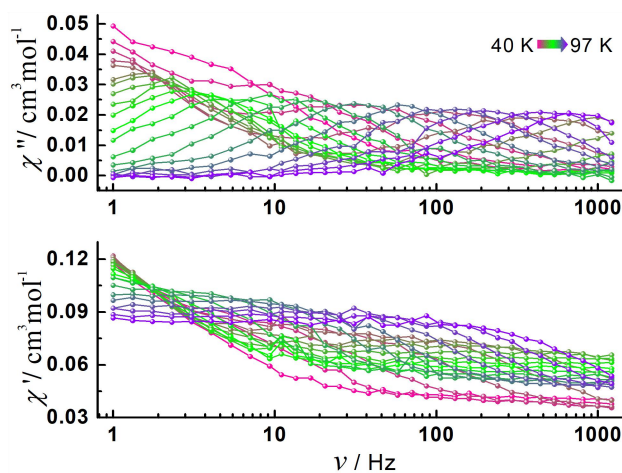

**Figure S6.** Frequency-dependence of the in-phase  $\chi'$  and out-of-phase  $\chi''$  in a zero dc field for **1** with ac frequencies of 1-1218 Hz.

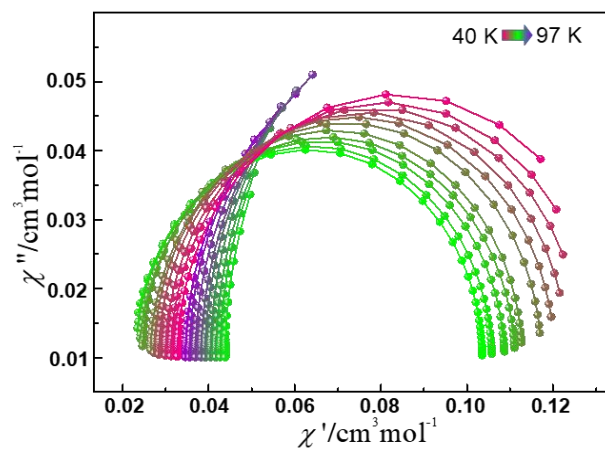

**Figure S7.** Cole-Cole plots for the ac susceptibilities in a zero dc field for **1**. The solid lines are the best fit to Debye's law.

## 4. Electronic Structure Calculations

Complete Active Space Self-consistent Field (CASSCF) calculation was performed to understand magnetic properties of **1** via its electronic structure using OPEN MOLCAS<sup>[1]</sup> and its geometry structure was obtained straightly from X-Ray single crystal structure without optimization. The basis sets from the ANO-RCC library<sup>[2]</sup> were employed for all atoms: VTZP quality for Dy, VDZP quality for O and N atoms as well as VDZ quality for others. 21 sextets, 224 quartets and 490 doublets were calculated in RASSCF module to acquire the state-averaged CASSCF orbitals. Then spin-orbit (SO) coupling Hamiltonian was constructed and diagonalized in RASSI module<sup>[3]</sup> through chosen 21 sextets, 128 quartets and 130 doublets. Ultimately all magnetic properties of Dy(III) ion, such as *g*-tensors, crystal field parameters, transition magnetic moment matrix, magnetic susceptibility and magnetization plot, were computed and output via SINGLE\_ANISO program<sup>[4]</sup>. For assuring calculation accuracy, we also considered employing the Cholesky decomposition for two-electron integrals.

**Table S5** *Ab initio* results for the  $J = 15/2$  multiple of Dy<sup>III</sup> in **1**.

| Energy<br>(cm <sup>-1</sup> ) | Energy<br>(K) | <i>g<sub>x</sub></i> | <i>g<sub>y</sub></i> | <i>g<sub>z</sub></i> | <i>g<sub>z</sub></i> Angle (°) | Crystal field<br>Wavefunction        |
|-------------------------------|---------------|----------------------|----------------------|----------------------|--------------------------------|--------------------------------------|
| 0                             | 0             | 0.00                 | 0.00                 | 19.89                | -                              | 99.9% ±15/2>                         |
| 543                           | 781           | 0.00                 | 0.00                 | 16.98                | 1.32                           | 99.8% ±13/2>                         |
| 904                           | 1300          | 0.09                 | 0.11                 | 14.26                | 3.42                           | 99.4% ±11/2>                         |
| 1096                          | 1576          | 0.81                 | 1.96                 | 10.58                | 10.85                          | 87.1% ±9/2>                          |
| 1138                          | 1636          | 1.44                 | 4.98                 | 12.96                | 86.86                          | 70.1% ±1/2>                          |
| 1155                          | 1660          | 0.99                 | 3.61                 | 7.49                 | 88.78                          | 16.5% ±3/2>+41.0% ∓3/2>+21.8% ∓7/2>  |
| 1186                          | 1705          | 3.26                 | 4.01                 | 13.71                | 87.84                          | 11.6% ±5/2>+ 22.2% ∓3/2>+35.7% ∓7/2> |
| 1195                          | 1718          | 1.18                 | 5.61                 | 12.36                | 82.40                          | 54.1% ±5/2> +23.3% ∓7/2>             |

\*Only components with > 10% contribution are given, rounded to the nearest percent.

**Table S6** *Ab initio* calculated crystal field parameters for **1**.

| Crystal Field<br>Parameter( $B_q^k$ ) |    | Value / $\text{cm}^{-1}$ | Crystal Field<br>Parameter( $B_q^k$ ) |    | Value / $\text{cm}^{-1}$ |
|---------------------------------------|----|--------------------------|---------------------------------------|----|--------------------------|
| q                                     | k  |                          | q                                     | k  |                          |
| 2                                     | -2 | 0.16860990836356E-01     | 6                                     | -6 | -0.31084107978718E-04    |
| 2                                     | -1 | -0.19680699199121E-01    | 6                                     | -5 | -0.16901297741972E-04    |
| 2                                     | 0  | -0.65300508096316E+01    | 6                                     | -4 | 0.33265651601129E-04     |
| 2                                     | 1  | 0.90487472385106E-02     | 6                                     | -3 | -0.34879042563356E-04    |
| 2                                     | 2  | 0.40649055336602E+00     | 6                                     | -2 | 0.26612047507683E-05     |
| 4                                     | -4 | 0.43943620276023E-02     | 6                                     | -1 | 0.29672991397177E-04     |
| 4                                     | -3 | -0.55323343438564E-02    | 6                                     | 0  | 0.13229739082706E-04     |
| 4                                     | -2 | -0.20422541516122E-03    | 6                                     | 1  | -0.17214006060346E-04    |
| 4                                     | -1 | 0.45422261591697E-02     | 6                                     | 2  | 0.30193690203995E-05     |
| 4                                     | 0  | -0.13955624451093E-01    | 6                                     | 3  | -0.30863681029782E-04    |
| 4                                     | 1  | -0.17384774314924E-02    | 6                                     | 4  | 0.24365214177074E-04     |
| 4                                     | 2  | 0.80087584394893E-03     | 6                                     | 5  | -0.19712406667379E-03    |
| 4                                     | 3  | -0.57855134523574E-02    | 6                                     | 6  | -0.88795517281251E-04    |
| 4                                     | 4  | 0.40687627009409E-02     |                                       |    |                          |

**Table S7** *Ab initio* calculated LoProp charges of the atoms near Dy center in **1**.

| Dy     | O <sub>1</sub> | O <sub>2</sub> | N <sub>1</sub> | N <sub>2</sub> | N <sub>3</sub> | N <sub>4</sub> | N <sub>5</sub> |
|--------|----------------|----------------|----------------|----------------|----------------|----------------|----------------|
| 2.4385 | -1.0467        | -1.0664        | -0.3639        | -0.3559        | -0.3656        | -0.3592        | -0.3584        |

**Table S8** Average transition magnetic moment elements between the states of **1**, given in  $\mu_B^2$ .

|                         | $ +\frac{15}{2}\rangle$ | $ -\frac{15}{2}\rangle$ | $ +\frac{13}{2}\rangle$ | $ -\frac{13}{2}\rangle$ | $ +\frac{11}{2}\rangle$ | $ -\frac{11}{2}\rangle$ | $ +\frac{9}{2}\rangle$ | $ -\frac{9}{2}\rangle$ | $ +a\rangle$ | $  -a\rangle$ | $ +b\rangle$ | $  -b\rangle$ | $ +c\rangle$ | $  -c\rangle$ | $ +d\rangle$ | $  -d\rangle$ |
|-------------------------|-------------------------|-------------------------|-------------------------|-------------------------|-------------------------|-------------------------|------------------------|------------------------|--------------|---------------|--------------|---------------|--------------|---------------|--------------|---------------|
| $ +\frac{15}{2}\rangle$ |                         | 1.5E-10                 | 4.4E+00                 | 3.4E-07                 | 4.3E-03                 | 1.2E-06                 | 8.9E-04                | 1.1E-05                | 1.7E-04      | 1.7E-05       | 3.1E-04      | 3.9E-05       | 1.6E-04      | 2.5E-05       | 1.1E-04      | 1.5E-04       |
| $ -\frac{15}{2}\rangle$ | 1.5E-10                 |                         | 3.4E-07                 | 4.4E+00                 | 1.2E-06                 | 4.3E-03                 | 1.1E-05                | 8.9E-04                | 1.7E-05      | 1.7E-04       | 3.9E-05      | 3.1E-04       | 2.5E-05      | 1.6E-04       | 1.5E-04      | 1.1E-04       |
| $ +\frac{13}{2}\rangle$ | 4.4E+00                 | 3.4E-07                 |                         | 9.8E-06                 | 8.3E+00                 | 3.5E-04                 | 1.1E-02                | 2.0E-03                | 3.4E-03      | 5.0E-03       | 3.3E-03      | 9.5E-04       | 2.4E-03      | 1.5E-04       | 1.2E-03      | 2.7E-03       |
| $ -\frac{13}{2}\rangle$ | 3.4E-07                 | 4.4E+00                 | 9.8E-06                 |                         | 3.5E-04                 | 8.3E+00                 | 2.0E-03                | 1.1E-02                | 5.0E-03      | 3.4E-03       | 9.5E-04      | 3.3E-03       | 1.5E-04      | 2.4E-03       | 2.7E-03      | 1.2E-03       |
| $ +\frac{11}{2}\rangle$ | 4.3E-03                 | 1.2E-06                 | 8.3E+00                 | 3.5E-04                 |                         | 4.6E-03                 | 1.1E+01                | 1.6E-01                | 2.9E-01      | 1.7E-01       | 6.3E-02      | 2.2E-01       | 3.0E-02      | 3.2E-03       | 1.5E-02      | 4.3E-02       |
| $ -\frac{11}{2}\rangle$ | 1.2E-06                 | 4.3E-03                 | 3.5E-04                 | 8.3E+00                 | 4.6E-03                 |                         | 1.6E-01                | 1.1E+01                | 1.7E-01      | 2.9E-01       | 2.2E-01      | 6.3E-02       | 3.2E-03      | 3.0E-02       | 4.3E-02      | 1.5E-02       |
| $ +\frac{9}{2}\rangle$  | 8.9E-04                 | 1.1E-05                 | 1.1E-02                 | 2.0E-03                 | 1.1E+01                 | 1.6E-01                 |                        | 8.9E-01                | 1.4E+00      | 2.7E+00       | 5.8E+00      | 9.9E-01       | 3.6E+00      | 5.6E-01       | 1.5E+00      | 3.8E-01       |
| $ -\frac{9}{2}\rangle$  | 1.1E-05                 | 8.9E-04                 | 2.0E-03                 | 1.1E-02                 | 1.6E-01                 | 1.1E+01                 | 8.9E-01                |                        | 2.7E+00      | 1.4E+00       | 9.9E-01      | 5.8E+00       | 5.6E-01      | 3.6E+00       | 3.8E-01      | 1.5E+00       |
| $ +a\rangle$            | 1.7E-04                 | 1.7E-05                 | 3.4E-03                 | 5.0E-03                 | 2.9E-01                 | 1.7E-01                 | 1.4E+00                | 2.7E+00                |              | 1.4E+01       | 1.1E+01      | 2.8E+00       | 1.3E+00      | 8.5E-01       | 5.2E-01      | 5.0E-01       |
| $  -a\rangle$           | 1.7E-05                 | 1.7E-04                 | 5.0E-03                 | 3.4E-03                 | 1.7E-01                 | 2.9E-01                 | 2.7E+00                | 1.4E+00                | 1.4E+01      |               | 2.8E+00      | 1.1E+01       | 8.5E-01      | 1.3E+00       | 5.0E-01      | 5.2E-01       |
| $ +b\rangle$            | 3.1E-04                 | 3.9E-05                 | 3.3E-03                 | 9.5E-04                 | 6.3E-02                 | 2.2E-01                 | 5.8E+00                | 9.9E-01                | 1.1E+01      | 2.8E+00       |              | 5.2E+00       | 1.2E+00      | 1.4E+00       | 2.1E+00      | 6.6E+00       |
| $  -b\rangle$           | 3.9E-05                 | 3.1E-04                 | 9.5E-04                 | 3.3E-03                 | 2.2E-01                 | 6.3E-02                 | 9.9E-01                | 5.8E+00                | 2.8E+00      | 1.1E+01       | 5.2E+00      |               | 1.4E+00      | 1.2E+00       | 6.6E+00      | 2.1E+00       |
| $ +c\rangle$            | 1.6E-04                 | 2.5E-05                 | 2.4E-03                 | 1.5E-04                 | 3.0E-02                 | 3.2E-03                 | 3.6E+00                | 5.6E-01                | 1.3E+00      | 8.5E-01       | 1.2E+00      | 1.4E+00       |              | 1.3E+01       | 5.3E+00      | 5.8E+00       |
| $  -c\rangle$           | 2.5E-05                 | 1.6E-04                 | 1.5E-04                 | 2.4E-03                 | 3.2E-03                 | 3.0E-02                 | 5.6E-01                | 3.6E+00                | 8.5E-01      | 1.3E+00       | 1.4E+00      | 1.2E+00       | 1.3E+01      |               | 5.8E+00      | 5.3E+00       |
| $ +d\rangle$            | 1.1E-04                 | 1.5E-04                 | 1.2E-03                 | 2.7E-03                 | 1.5E-02                 | 4.3E-02                 | 1.5E+00                | 3.8E-01                | 5.2E-01      | 5.0E-01       | 2.1E+00      | 6.6E+00       | 5.3E+00      | 5.8E+00       |              | 9.3E+00       |
| $  -d\rangle$           | 1.5E-04                 | 1.1E-04                 | 2.7E-03                 | 1.2E-03                 | 4.3E-02                 | 1.5E-02                 | 3.8E-01                | 1.5E+00                | 5.0E-01      | 5.2E-01       | 6.6E+00      | 2.1E+00       | 5.8E+00      | 5.3E+00       | 9.3E+00      |               |



## 5. DFT calculations

To acquire wave function information of both complexes and electrostatic potentials (ESP) of distinctive solvents and transversal ligand, the calculations based on Density Function Theory (DFT) were performed using Gaussian 09D<sup>[5]</sup>. The PBE density functional<sup>[6,7]</sup> was employed in all calculations with Grimme's D3 dispersion correction considered<sup>[8-10]</sup>. Primarily, the positions of hydrogen atoms of **1** and **2** were optimized. We replaced Dy(III) ion to Y(III) in light of similar radius between them, and set its atomic mass as 162.5 (the same as natural abundance-weighted mass of dysprosium). The Stuttgart RSC 1997 effective core potential (ECP)<sup>[11,12]</sup> was applied for 28 core electrons of Y(III) and corresponding valence basis set was used for the remaining valence electrons, while the rest of atoms were treated with cc-pVDZ<sup>[13,14]</sup> basis set. Then the whole molecules of toluene, THF and 4-phenylpyridine were optimized by the same basis set. Harmonic vibrational calculations indicate that there is no imaginary vibration mode and all optimized minimum-energy structures have already been at stationary points on the potential energy surface.

**Table S9** Geometry coordinates of **1** in population analysis calculations.

|    |         |         |         |
|----|---------|---------|---------|
| Dy | -0.2003 | 0.0679  | 0.1465  |
| O  | -0.1715 | -0.0710 | -1.9740 |
| O  | -0.2583 | 0.0290  | 2.2664  |
| N  | -2.6313 | 0.8246  | 0.0185  |
| N  | -0.2931 | 2.6553  | 0.0679  |
| N  | 1.5577  | -1.8218 | 0.2805  |
| N  | -1.6081 | -2.1099 | 0.1026  |
| N  | 2.1568  | 1.0781  | 0.0501  |
| C  | -0.2378 | -0.1831 | -3.3222 |
| C  | -0.3136 | -0.1592 | 3.6421  |
| C  | -3.1295 | 1.3290  | -1.1140 |
| C  | -3.5060 | 0.5786  | 0.9951  |
| C  | 0.2699  | 3.3674  | -0.9283 |
| C  | -0.8147 | 3.3708  | 1.0775  |
| C  | 1.7123  | -2.7127 | -0.7112 |
| C  | 2.5522  | -1.7674 | 1.1847  |
| C  | -1.3031 | -3.1632 | 0.8729  |
| C  | -2.7143 | -2.2382 | -0.6451 |
| C  | 2.8399  | 0.9495  | -1.0961 |
| C  | 2.8561  | 1.4773  | 1.1272  |
| C  | -0.1420 | 1.2019  | -3.9560 |
| C  | 0.9166  | -1.0482 | -3.8644 |
| C  | -1.5605 | -0.8552 | -3.7606 |
| C  | 0.6830  | 0.8084  | 4.2817  |
| C  | 0.0624  | -1.5815 | 4.0119  |
| C  | -1.7173 | 0.1295  | 4.1618  |
| C  | -4.4666 | 1.5733  | -1.3296 |
| C  | -4.8654 | 0.8124  | 0.8662  |
| C  | 0.3519  | 4.7433  | -0.9379 |
| C  | -0.7778 | 4.7492  | 1.1392  |
| C  | 2.8191  | -3.5042 | -0.8676 |
| C  | 3.7021  | -2.5186 | 1.0979  |

|   |         |         |         |
|---|---------|---------|---------|
| C | -2.0505 | -4.3271 | 0.9287  |
| C | -3.5247 | -3.3448 | -0.6431 |
| C | 4.1913  | 1.1546  | -1.2057 |
| C | 4.2254  | 1.6602  | 1.1110  |
| C | -5.3869 | 1.3204  | -0.3138 |
| C | -0.1708 | 5.4823  | 0.1189  |
| C | 3.8770  | -3.4029 | 0.0333  |
| C | -3.2108 | -4.4256 | 0.1720  |
| C | 4.9374  | 1.4692  | -0.0719 |
| C | -6.8377 | 1.5388  | -0.4821 |
| C | -0.0499 | 6.9626  | 0.1701  |
| C | 5.1306  | -4.1866 | -0.1175 |
| C | -4.0664 | -5.6413 | 0.2081  |
| C | 6.4099  | 1.5074  | -0.1508 |
| C | -7.6441 | 1.8911  | 0.6109  |
| C | -7.4495 | 1.3746  | -1.7355 |
| C | 1.0051  | 7.5968  | -0.4686 |
| C | -0.9250 | 7.7338  | 0.9134  |
| C | 5.1130  | -5.4905 | -0.5713 |
| C | 6.3587  | -3.6052 | 0.1824  |
| C | -3.5031 | -6.9158 | 0.2171  |
| C | -5.4560 | -5.5241 | 0.2474  |
| C | 7.0679  | 2.1989  | -1.1494 |
| C | 7.1689  | 0.7136  | 0.7162  |
| C | -9.0140 | 2.0210  | 0.4582  |
| C | -8.8160 | 1.5288  | -1.8656 |
| C | 1.1579  | 8.9818  | -0.3652 |
| C | -0.7475 | 9.1003  | 1.0196  |
| C | 6.2919  | -6.2119 | -0.6806 |
| C | 7.5324  | -4.3500 | 0.0560  |
| C | -4.3158 | -8.0363 | 0.2263  |
| C | -6.2484 | -6.6466 | 0.2815  |
| C | 8.4422  | 2.1285  | -1.2904 |
| C | 8.5370  | 0.6165  | 0.5420  |
| C | -9.6004 | 1.8399  | -0.7691 |
| C | 0.2827  | 9.7189  | 0.3870  |
| C | 7.4863  | -5.6454 | -0.3704 |
| C | -5.6887 | -7.9042 | 0.2721  |
| C | 9.1662  | 1.3241  | -0.4456 |
| H | -7.1855 | 2.0670  | 1.5947  |
| H | -6.8452 | 1.0854  | -2.6076 |
| H | 1.7457  | 7.0170  | -1.0369 |
| H | -1.7829 | 7.2639  | 1.4161  |
| H | 4.1553  | -5.9778 | -0.8075 |
| H | 6.4112  | -2.5533 | 0.5003  |
| H | -2.4098 | -7.0305 | 0.1721  |
| H | -5.9160 | -4.5247 | 0.2694  |
| H | 6.4845  | 2.8303  | -1.8378 |
| H | 6.6660  | 0.1357  | 1.5066  |
| H | -9.6291 | 2.2892  | 1.3297  |
| H | -9.2842 | 1.3846  | -2.8504 |
| H | 2.0019  | 9.4677  | -0.8760 |
| H | -1.4614 | 9.6854  | 1.6181  |
| H | 6.2462  | -7.2563 | -1.0232 |
| H | 8.4952  | -3.8733 | 0.2921  |



|   |          |         |         |
|---|----------|---------|---------|
| H | -3.8583  | -9.0363 | 0.2074  |
| H | -7.3420  | -6.5344 | 0.3253  |
| H | 8.9414   | 2.7056  | -2.0815 |
| H | 9.1206   | -0.0308 | 1.2135  |
| H | -10.6885 | 1.9468  | -0.8853 |
| H | 0.4155   | 10.8073 | 0.4758  |
| H | 8.4151   | -6.2277 | -0.4633 |
| H | -6.3299  | -8.7971 | 0.2927  |
| H | 10.2572  | 1.2453  | -0.5644 |
| H | -2.3889  | 1.5381  | -1.9006 |
| H | -3.0886  | 0.1585  | 1.9209  |
| H | 0.6722   | 2.7773  | -1.7639 |
| H | -1.2684  | 2.7824  | 1.8908  |
| H | 0.8857   | -2.7535 | -1.4361 |
| H | 2.3992   | -1.0634 | 2.0153  |
| H | -0.3982  | -3.0554 | 1.4880  |
| H | -2.9502  | -1.3868 | -1.2982 |
| H | 2.2377   | 0.6224  | -1.9574 |
| H | 2.2733   | 1.6150  | 2.0509  |
| H | -0.9449  | 1.8652  | -3.5716 |
| H | -0.2262  | 1.1740  | -5.0618 |
| H | 0.8321   | 1.6746  | -3.7083 |
| H | 1.9008   | -0.6425 | -3.5515 |
| H | 0.9097   | -1.1011 | -4.9721 |
| H | 0.8409   | -2.0847 | -3.4786 |
| H | -1.6339  | -1.8692 | -3.3182 |
| H | -1.6300  | -0.9547 | -4.8629 |
| H | -2.4341  | -0.2646 | -3.4163 |
| H | 0.6706   | 0.7685  | 5.3908  |
| H | 1.7148   | 0.5666  | 3.9512  |
| H | 0.4575   | 1.8492  | 3.9702  |
| H | 0.0711   | -1.7336 | 5.1110  |
| H | -0.6632  | -2.3013 | 3.5816  |
| H | 1.0695   | -1.8408 | 3.6283  |
| H | -1.7777  | 0.0483  | 5.2663  |
| H | -2.0373  | 1.1533  | 3.8772  |
| H | -2.4422  | -0.5953 | 3.7359  |
| H | -4.7862  | 1.9990  | -2.2906 |
| H | -5.5263  | 0.5575  | 1.7063  |
| H | 0.8123   | 5.2402  | -1.8025 |
| H | -1.1955  | 5.2522  | 2.0218  |
| H | 2.8829   | -4.1797 | -1.7323 |
| H | 4.4716   | -2.4224 | 1.8764  |
| H | -1.7426  | -5.1389 | 1.6019  |
| H | -4.4070  | -3.3731 | -1.2973 |
| H | 4.6906   | 0.9946  | -2.1719 |
| H | 4.7467   | 1.9517  | 2.0342  |

**Table S10** Geometry coordinates of **2** in population analysis calculations.

|    |        |         |         |
|----|--------|---------|---------|
| Dy | 0.0066 | -0.0001 | -0.0001 |
| O  | 0.0066 | 0.0088  | 2.0642  |
| O  | 0.0066 | -0.0107 | -2.0629 |

|   |         |         |         |
|---|---------|---------|---------|
| N | 0.0071  | 2.4666  | -0.0110 |
| N | 2.4741  | -0.0015 | 0.0006  |
| N | -2.4610 | -0.0003 | 0.0006  |
| N | 0.0060  | -2.4684 | 0.0123  |
| C | 0.0066  | 0.0175  | 3.4985  |
| C | 0.0066  | -0.0156 | -3.4997 |
| C | 0.7592  | 3.1970  | 0.8203  |
| C | -0.7446 | 3.1895  | -0.8518 |
| C | 3.1991  | 0.7481  | -0.8403 |
| C | 3.1988  | -0.7477 | 0.8390  |
| C | -3.1860 | -0.7541 | -0.8332 |
| C | -3.1856 | 0.7575  | 0.8319  |
| C | -0.7461 | -3.1873 | 0.8505  |
| C | 0.7577  | -3.1955 | -0.8217 |
| C | 0.1203  | 1.5245  | 3.8280  |
| C | 1.1497  | -0.7978 | 4.0641  |
| C | -1.4028 | -0.2343 | 4.0615  |
| C | 0.1195  | -1.5245 | -3.8280 |
| C | 1.1501  | 0.7973  | -4.0642 |
| C | -1.4027 | 0.2349  | -4.0615 |
| H | 1.3706  | 2.6212  | 1.5313  |
| C | 0.8054  | 4.5541  | 0.8222  |
| H | -1.3464 | 2.6038  | -1.5665 |
| C | -0.7901 | 4.5465  | -0.8652 |
| H | 2.6176  | 1.3514  | -1.5553 |
| C | 4.5570  | 0.7927  | -0.8475 |
| H | 2.6181  | -1.3512 | 1.5549  |
| C | 4.5567  | -0.7948 | 0.8475  |
| H | -2.6047 | -1.3684 | -1.5395 |
| C | -4.5439 | -0.8007 | -0.8400 |
| H | -2.6039 | 1.3723  | 1.5373  |
| C | -4.5436 | 0.8028  | 0.8400  |
| H | -1.3481 | -2.6016 | 1.5650  |
| C | -0.7923 | -4.5461 | 0.8652  |
| H | 1.3686  | -2.6192 | -1.5325 |
| C | 0.8032  | -4.5544 | -0.8223 |
| H | 1.1105  | 1.9282  | 3.5231  |
| H | -0.6600 | 2.0794  | 3.2752  |
| H | 0.0065  | 1.7400  | 4.9117  |
| H | 1.0629  | -1.8614 | 3.7572  |
| H | 2.1139  | -0.4017 | 3.6890  |
| H | 1.1697  | -0.7623 | 5.1724  |
| H | -1.7710 | -1.2634 | 3.8458  |
| H | -1.4220 | -0.1039 | 5.1616  |
| H | -2.1187 | 0.4753  | 3.6099  |
| H | 1.1099  | -1.9279 | -3.5234 |
| H | -0.6606 | -2.0782 | -3.2740 |
| H | 0.0050  | -1.7410 | -4.9115 |
| H | 1.0652  | 1.8612  | -3.7579 |
| H | 2.1137  | 0.3999  | -3.6889 |
| H | 1.1702  | 0.7615  | -5.1724 |
| H | -1.7719 | 1.2638  | -3.8460 |
| H | -1.4220 | 0.1046  | -5.1616 |
| H | -2.1179 | -0.4751 | -3.6098 |
| H | 1.4583  | 5.0592  | 1.5481  |

|   |          |          |         |
|---|----------|----------|---------|
| C | 0.0078   | 5.2769   | -0.0243 |
| H | -1.4402  | 5.0464   | -1.5973 |
| H | 5.0605   | 1.4410   | -1.5788 |
| C | 5.2844   | -0.0021  | 0.0006  |
| H | 5.0581   | -1.4437  | 1.5796  |
| H | -5.0467  | -1.4551  | -1.5662 |
| C | -5.2713  | 0.0003   | 0.0006  |
| H | -5.0462  | 1.4589   | 1.5648  |
| H | -1.4436  | -5.0444  | 1.5973  |
| C | 0.0053   | -5.2787  | 0.0256  |
| H | 1.4551   | -5.0601  | -1.5487 |
| C | 0.0081   | 6.7635   | -0.0326 |
| C | 6.7693   | -0.0007  | -0.0007 |
| C | -6.7561  | 0.0024   | -0.0007 |
| C | 0.0050   | -6.7618  | 0.0313  |
| C | -1.1485  | 7.4624   | -0.2777 |
| C | 1.1651   | 7.4641   | 0.2072  |
| C | 7.4696   | -1.1574  | 0.2479  |
| C | 7.4701   | 1.1539   | -0.2479 |
| C | -7.4565  | 1.1597   | 0.2370  |
| C | -7.4570  | -1.1562  | -0.2370 |
| C | 1.1616   | -7.4646  | -0.2072 |
| C | -1.1520  | -7.4618  | 0.2777  |
| H | -2.0935  | 6.9249   | -0.4478 |
| C | -1.1454  | 8.8438   | -0.2606 |
| H | 2.1095   | 6.9276   | 0.3833  |
| C | 1.1627   | 8.8453   | 0.1784  |
| H | 6.9319   | -2.1009  | 0.4255  |
| C | 8.8518   | -1.1560  | 0.2256  |
| H | 6.9344   | 2.0986   | -0.4250 |
| C | 8.8524   | 1.1500   | -0.2243 |
| H | -6.9202  | 2.1055   | 0.4060  |
| C | -8.8387  | 1.1563   | 0.2147  |
| H | -6.9200  | -2.1019  | -0.4046 |
| C | -8.8393  | -1.1539  | -0.2134 |
| H | 2.1069   | -6.9292  | -0.3822 |
| C | 1.1586   | -8.8477  | -0.1771 |
| H | -2.0968  | -6.9241  | 0.4485  |
| C | -1.1496  | -8.8451  | 0.2619  |
| H | -2.0851  | 9.3884   | -0.4327 |
| C | 0.0088   | 9.5118   | -0.0456 |
| H | 2.1024   | 9.3911   | 0.3460  |
| H | 9.3973   | -2.0946  | 0.4000  |
| C | 9.5176   | -0.0013  | -0.0007 |
| H | 9.3977   | 2.0889   | -0.3983 |
| H | -9.3836  | 2.0968   | 0.3805  |
| C | -9.5045  | 0.0032   | -0.0007 |
| H | -9.3850  | -2.0941  | -0.3783 |
| H | 2.0979   | -9.3942  | -0.3440 |
| C | 0.0043   | -9.5100  | 0.0443  |
| H | -2.0890  | -9.3896  | 0.4346  |
| H | 0.0091   | 10.6129  | -0.0511 |
| H | 10.6188  | -0.0015  | -0.0009 |
| H | -10.6057 | 0.0036   | -0.0010 |
| H | 0.0040   | -10.6113 | 0.0492  |

**Table S11** Geometry coordinates of toluene molecule in population analysis calculations.

|   |         |         |         |
|---|---------|---------|---------|
| C | -1.9137 | -0.0051 | -0.0003 |
| C | -1.1999 | -1.2148 | -0.0001 |
| C | 0.2014  | -1.2063 | 0.0004  |
| C | 0.9211  | 0.0068  | 0.0005  |
| C | 0.1923  | 1.2113  | 0.0004  |
| C | -1.2116 | 1.2086  | -0.0001 |
| H | -3.0133 | -0.0104 | -0.0006 |
| H | -1.7404 | -2.1730 | 0.0000  |
| H | 0.7526  | -2.1597 | 0.0007  |
| H | 0.7368  | 2.1683  | 0.0007  |
| H | -1.7590 | 2.1628  | 0.0000  |
| C | 2.4302  | 0.0035  | -0.0003 |
| H | 2.8329  | -0.5332 | 0.8837  |
| H | 2.8317  | -0.5109 | -0.8983 |
| H | 2.8399  | 1.0317  | 0.0119  |

**Table S12** Geometry coordinates of THF molecule in population analysis calculations.

|   |         |         |         |
|---|---------|---------|---------|
| C | 1.1255  | -0.4722 | -0.1672 |
| O | -0.0013 | -1.2069 | 0.3106  |
| C | -1.1278 | -0.4692 | -0.1634 |
| C | -0.7752 | 1.0195  | 0.0510  |
| C | 0.7790  | 1.0160  | 0.0560  |
| H | 2.0167  | -0.8211 | 0.3892  |
| H | 1.2887  | -0.6742 | -1.2563 |
| H | -1.2982 | -0.6752 | -1.2505 |
| H | -2.0171 | -0.8126 | 0.3995  |
| H | -1.2003 | 1.6616  | -0.7449 |
| H | -1.1703 | 1.3817  | 1.0200  |
| H | 1.2126  | 1.6630  | -0.7314 |
| H | 1.1690  | 1.3675  | 1.0310  |

**Table S13** Geometry coordinates of 4-phenylpyridine in population analysis calculations.

|   |         |         |         |
|---|---------|---------|---------|
| C | 2.8869  | 1.0855  | 0.3557  |
| C | 1.4870  | 1.1398  | 0.3739  |
| C | 0.7439  | 0.0000  | 0.0000  |
| C | 1.4870  | -1.1398 | -0.3739 |
| C | 2.8869  | -1.0855 | -0.3557 |
| N | 3.6029  | 0.0000  | 0.0000  |
| H | 3.4736  | 1.9715  | 0.6529  |
| H | 0.9766  | 2.0561  | 0.7040  |
| H | 0.9766  | -2.0561 | -0.7040 |
| H | 3.4736  | -1.9715 | -0.6529 |
| C | -0.7387 | 0.0000  | 0.0000  |
| C | -1.4622 | -1.1610 | 0.3523  |
| C | -1.4622 | 1.1610  | -0.3523 |
| C | -2.8631 | -1.1600 | 0.3546  |
| H | -0.9166 | -2.0661 | 0.6559  |
| C | -2.8631 | 1.1600  | -0.3546 |

|   |         |         |         |
|---|---------|---------|---------|
| H | -0.9166 | 2.0661  | -0.6559 |
| C | -3.5695 | 0.0000  | 0.0000  |
| H | -3.4077 | -2.0708 | 0.6429  |
| H | -3.4077 | 2.0708  | -0.6429 |
| H | -4.6690 | 0.0000  | 0.0000  |

## References

- [1] Ignacio, F., Galván, M., Ali, A., Celestino, A., Francesco, A., Jochen, A., Jie, J. B., Sergey, I. B., Nikolay, A. B., Rebecca, K. C., Liviu, F. C., Joel, C., Nike, D., Mickaël, G. D., Sijia, S. D., Andreas, D., Leon, F., Luis, M. F., Laura, G., Frédéric, G., Angelo, G., Leticia, G., Gilbert, G., M-Y Guo, Chad, E. H., Marcus, J., Sebastian, K., Stefan, K., Goran, K., Erik, K., Giovanni, L. M., Marcus, L., Y-J Ma, Sebastian, Mai., João, P. M., Per, Å. M., Philipp, M., Stefanie, A. M., Jesper, N., Massimo, O., Markus, O., Quan, M. P., Kristine, Pierloot., Felix, P., Markus, R., Andrew, M. S., Igor, S., Prachi, S., Christopher, J. S., Lasse, K. S., Donald, G. T., Mihkel, U., Liviu, U., Alessio, V., Steven, V., Valera, V., Oskar, W., Tomasz, A. W., Per-Olof, W., Sebastian, W., Alexander, Z., J. Patrick, Z., and Roland, L. *J. Chem. Theory Comput.*, **2019**, 15, 11, 5925-5964.
- [2] B. O. Roos, R. Lindh, P.-Å. Malmqvist, V. Veryazov and P.-O. Widmark, *J. Phys. Chem. A*, **2004**, 108, 2851–2858.
- [3] P. A. Malmqvist, B. O. Roos, B. Schimmelpfennig. *Chem. Phys. Lett.*, **2002**, 357, 230–240.
- [4] B. O. Roos, R. Lindh, P.-Å. Malmqvist, V. Veryazov and P.-O. Widmark, *Chem. Phys. Lett.*, **2005**, 409, 295–299.
- [5] Frisch, M. J.; Trucks, G. W.; Schlegel, H. B.; Scuseria, G. E.; Robb, M. A.; Cheeseman, J. R.; Scalmani, G.; Barone, V.; Mennucci, B.; Petersson, G. A.; Nakatsuji, H.; Caricato, M.; Li, X.; Hratchian, H. P.; Izmaylov, A. F.; Bloino, J.; Zheng, G.; Sonnenberg, J. L.; Hada, M.; Ehara, M.; Toyota, K.; Fukuda, R.; Hasegawa, J.; Ishida, M.; Nakajima, T.; Honda, Y.; Kitao, O.; Nakai, H.; Vreven, T.; Montgomery, J. A., Jr.; Peralta, J. E.; Ogliaro, F.; Bearpark, M.; Heyd, J. J.; Brothers, E.; Kudin, K. N.; Staroverov, V. N.; Kobayashi, R.; Normand, J.; Raghavachari, K.; Rendell, A.; Burant, J. C.; Iyengar, S. S.; Tomasi, J.; Cossi, M.; Rega, N.; Millam, N. J.; Klene, M.; Knox, J. E.; Cross, J. B.; Bakken, V.; Adamo, C.; Jaramillo, J.; Gomperts, R.; Stratmann, R. E.; Yazyev, O.; Austin, A. J.; Cammi, R.; Pomelli, C.; Ochterski, J. W.; Martin, R. L.; Morokuma, K.; Zakrzewski, V. G.; Voth, G. A.; Salvador, P.; Dannenberg, J. J.; Dapprich, S.; Daniels, A. D.; Farkas, Ö.; Foresman, J. B.; Ortiz, J. V.; Cioslowski, J.; Fox, D. J. *Gaussian 09*; Gaussian, Inc.: Wallingford, CT, 2009.
- [6] Perdew, J. P., Burke, K., Ernzerhof, M., *Phys. Rev. Lett.*, **1996**, 77, 3865-3868.
- [7] Perdew, J. P., Burke, K., Ernzerhof, M., *Phys. Rev. Lett.*, **1997**, 78, 1396-1396; *Phys. Rev. Lett.*, **1996**, 77, 3865.
- [8] Grimme, S., *J. Comput. Chem.*, **2004**, 25, 1463–73.
- [9] Grimme, S., *J. Comput. Chem.*, **2006**, 27, 1787–99.
- [10] Grimme, S., *Wiley Interdiscip. Rev. Comput. Mol. Sci.*, **2011**, 1, 211–228.
- [11] Giuseppe, L., Ignazio, L. F., *Chem. Phys. Lett.*, **1996**, 255, 341–346.
- [12] Lucas, E. A., Stephen, H. Y., George, S. O., Angela, K. W., *J. Chem. Theory Comput.*, **2017**, 13, 6, 2831–2839.
- [13] Dunning, T.H., *J. Chem. Phys.*, **1989**, 90, 1007–1023.
- [14] Woon, D.E., Dunning, T.H., *J. Chem. Phys.*, **1993**, 98, 1358–1371.
